# Supplementary material for: Determination of 12 insect growth regulator residues in foods of different matrixes by modified QuEChERS and UPLC-MS/MS
Source: Royal Society of Chemistry journal article supplement (doi:10.1039/d1ra00046b), 2021-01-01
Supplement: d1ra00046b1.pdf [file d1ra00046b1.pdf]

**Table S1** Recoveries of 12 kinds of IGRs with different purification in fruit (%) <sup>a</sup>

| Compound            | PSA/<br>MgSO <sub>4</sub> | C <sub>18</sub> /<br>MgSO <sub>4</sub> | GCB/PSA/<br>MgSO <sub>4</sub> | GCB/C <sub>18</sub> /<br>PSA/MgSO <sub>4</sub> | GCB/C <sub>18</sub> / MgSO <sub>4</sub> | C <sub>18</sub> /PSA<br>/MgSO <sub>4</sub> |
|---------------------|---------------------------|----------------------------------------|-------------------------------|------------------------------------------------|-----------------------------------------|--------------------------------------------|
| Flonicamid          | 99.14                     | 101.92                                 | 96.43                         | 102.41                                         | 99.06                                   | 102.26                                     |
| Cyantraniliprole    | 90.95                     | 94.94                                  | 17.82                         | 16.58                                          | 21.21                                   | 88.37                                      |
| RH-5849             | 84.65                     | 100.04                                 | 71.77                         | 87.15                                          | 87.62                                   | 86.01                                      |
| Chlorantraniliprole | 86.63                     | 107.08                                 | 26.01                         | 24.11                                          | 27.49                                   | 85.09                                      |
| Methoxyfenozide     | 86.55                     | 92.96                                  | 76.40                         | 83.79                                          | 85.51                                   | 86.78                                      |
| Chromafenozide      | 88.00                     | 93.52                                  | 83.98                         | 83.90                                          | 82.61                                   | 86.26                                      |
| Fenoxycarb          | 86.72                     | 93.35                                  | 81.56                         | 80.87                                          | 82.93                                   | 89.07                                      |
| Tebufenozide        | 88.87                     | 98.71                                  | 82.64                         | 84.66                                          | 82.43                                   | 86.79                                      |
| Flubendiamide       | 79.90                     | 96.70                                  | 79.69                         | 91.98                                          | 87.46                                   | 98.09                                      |
| Buprofezin          | 89.38                     | 96.36                                  | 85.03                         | 82.54                                          | 87.28                                   | 88.96                                      |
| Tolfenpyrad         | 89.39                     | 96.73                                  | 53.79                         | 50.03                                          | 55.41                                   | 85.82                                      |
| Pyriproxyfen        | 80.76                     | 90.12                                  | 64.40                         | 60.06                                          | 69.14                                   | 80.05                                      |

<sup>a</sup> C<sub>18</sub>: 0.1g, PSA: 0.1g, GCB: 0.1g; MgSO<sub>4</sub>: 0.3g

**Table S2** Recoveries of 12 kinds of IGRs with different purification in vegetable oil (%) <sup>b</sup>

| Compound            | C <sub>18</sub> | MgSO <sub>4</sub> | PSA   | MgSO <sub>4</sub> /PSA | MgSO <sub>4</sub> /C <sub>18</sub> | C <sub>18</sub> /PSA | C <sub>18</sub> /PSA/MgSO <sub>4</sub> |
|---------------------|-----------------|-------------------|-------|------------------------|------------------------------------|----------------------|----------------------------------------|
| Flonicamid          | 84.84           | 82.62             | 73.71 | 91.71                  | 85.47                              | 77.76                | 79.75                                  |
| Cyantraniliprole    | 78.72           | 78.36             | 66.87 | 97.77                  | 78.71                              | 69.77                | 77.85                                  |
| RH-5849             | 89.22           | 71.43             | 78.60 | 85.86                  | 79.85                              | 78.01                | 88.47                                  |
| Chlorantraniliprole | 82.25           | 83.03             | 61.98 | 104.05                 | 69.06                              | 75.43                | 78.40                                  |
| Methoxyfenozide     | 73.92           | 67.96             | 65.73 | 90.76                  | 70.63                              | 73.54                | 74.87                                  |
| Chromafenozide      | 73.35           | 71.82             | 62.41 | 92.33                  | 67.29                              | 70.74                | 74.53                                  |
| Fenoxycarb          | 68.40           | 70.65             | 58.33 | 89.41                  | 64.89                              | 66.10                | 67.76                                  |
| Tebufenozide        | 71.26           | 70.97             | 62.81 | 94.86                  | 65.84                              | 71.95                | 72.52                                  |
| Flubendiamide       | 83.23           | 75.13             | 73.79 | 105.85                 | 77.42                              | 72.20                | 80.55                                  |
| Buprofezin          | 60.09           | 61.85             | 53.52 | 81.71                  | 58.79                              | 57.77                | 57.22                                  |
| Tolfenpyrad         | 49.12           | 51.49             | 43.49 | 65.90                  | 45.39                              | 47.66                | 47.83                                  |
| Pyriproxyfen        | 41.47           | 45.22             | 38.84 | 60.34                  | 41.78                              | 42.44                | 42.08                                  |

<sup>b</sup> C<sub>18</sub>: 0.1g, PSA: 0.1g, MgSO<sub>4</sub>: 0.3g

**Table S3** Recoveries of 12 kinds of IGRs with different purification in tea (%)

| Compound            | MgSO <sub>4</sub> /0.3 g  |              |                                    |                                    |                                    |
|---------------------|---------------------------|--------------|------------------------------------|------------------------------------|------------------------------------|
|                     | C <sub>18</sub> /<br>0.2g | PSA/<br>0.2g | PSA+C <sub>18</sub> /<br>0.1g+0.2g | PSA+C <sub>18</sub> /<br>0.2g+0.2g | PSA+C <sub>18</sub> /<br>0.3g+0.2g |
| Flonicamid          | 58.65                     | 49.89        | 62.97                              | 70.63                              | 59.88                              |
| Cyantraniliprole    | 60.35                     | 54.78        | 74.99                              | 71.06                              | 65.27                              |
| RH-5849             | 63.58                     | 56.34        | 87.81                              | 73.79                              | 71.65                              |
| Chlorantraniliprole | 65.48                     | 58.23        | 88.45                              | 71.57                              | 64.69                              |
| Methoxyfenozide     | 71.97                     | 63.95        | 91.15                              | 77.74                              | 70.63                              |
| Chromafenozide      | 74.06                     | 63.65        | 88.21                              | 80.80                              | 72.83                              |
| Fenoxycarb          | 89.15                     | 67.23        | 94.27                              | 82.99                              | 80.63                              |
| Tebufenozide        | 74.08                     | 62.52        | 89.44                              | 79.71                              | 71.79                              |
| Flubendiamide       | 78.87                     | 65.84        | 87.62                              | 84.66                              | 67.20                              |
| Buprofezin          | 82.23                     | 60.32        | 89.11                              | 80.43                              | 74.03                              |
| Tolfenpyrad         | 118.79                    | 188.77       | 110.81                             | 190.97                             | 142.49                             |
| Pyriproxyfen        | 89.71                     | 60.89        | 90.37                              | 81.90                              | 76.57                              |

**Table S4** Linear range, linear equations, LODs and LOQs of 12 IGRs in fruit

| Compound            | Linear range<br>( $\mu\text{g}\cdot\text{L}^{-1}$ ) | Calibration curve            | $R^2$  | LOD<br>( $\mu\text{g}\cdot\text{kg}^{-1}$ ) | LOQ<br>( $\mu\text{g}\cdot\text{kg}^{-1}$ ) |
|---------------------|-----------------------------------------------------|------------------------------|--------|---------------------------------------------|---------------------------------------------|
| Flonicamid          | 0.2 ~ 200                                           | $y = 24997.33x + 1302.71$    | 0.9999 | 0.55                                        | 1.84                                        |
| Cyantraniliprole    | 0.2 ~ 200                                           | $y = 22423.46x + 6437.74$    | 0.9999 | 0.84                                        | 2.81                                        |
| RH-5849             | 0.2 ~ 200                                           | $y = 90306.44x + 82718.90$   | 0.9997 | 0.11                                        | 0.36                                        |
| Chlorantraniliprole | 0.2 ~ 200                                           | $y = 28310.61x + 4315.26$    | 0.9998 | 0.17                                        | 0.54                                        |
| Methoxyfenozide     | 0.2 ~ 200                                           | $y = 198676.58x + 174721.83$ | 0.9998 | 0.18                                        | 0.57                                        |
| Chromafenozide      | 0.2 ~ 200                                           | $y = 251686.57x + 210908.47$ | 0.9997 | 0.40                                        | 1.33                                        |
| Fenoxycarb          | 0.2 ~ 200                                           | $y = 145366.36x + 11218.96$  | 0.9999 | 0.25                                        | 0.81                                        |
| Tebufenozide        | 0.2 ~ 200                                           | $y = 180928.60x + 260054.69$ | 0.9996 | 0.29                                        | 0.93                                        |
| Flubendiamide       | 0.2 ~ 200                                           | $y = 22,246.45x + 4335.81$   | 0.9995 | 0.19                                        | 0.64                                        |
| Buprofezin          | 0.2 ~ 200                                           | $y = 458808.92x + 818010.26$ | 0.9996 | 0.07                                        | 0.24                                        |
| Tolfenpyrad         | 0.2 ~ 200                                           | $y = 146371.94x + 8859.75$   | 0.9998 | 0.09                                        | 0.30                                        |
| Pyriproxyfen        | 0.2 ~ 200                                           | $y = 114387.95x + 75362.58$  | 0.9996 | 0.12                                        | 0.37                                        |

**Table S5** Linear range, linear equations, LODs and LOQs of 12 IGRs in Tea

| Compound            | Linear range<br>( $\mu\text{g}\cdot\text{L}^{-1}$ ) | Calibration curve            | $R^2$  | LOD<br>( $\mu\text{g}\cdot\text{kg}^{-1}$ ) | LOQ<br>( $\mu\text{g}\cdot\text{kg}^{-1}$ ) |
|---------------------|-----------------------------------------------------|------------------------------|--------|---------------------------------------------|---------------------------------------------|
| Flonicamid          | 0.5 ~ 200                                           | $y = 7076.89x + 3536.25$     | 0.9999 | 1.17                                        | 3.91                                        |
| Cyantraniliprole    | 0.5 ~ 200                                           | $y = 18712.27x + 5709.81$    | 0.9999 | 0.06                                        | 0.19                                        |
| RH-5849             | 0.2 ~ 200                                           | $y = 130864.25x + 105866.21$ | 0.9997 | 0.06                                        | 0.21                                        |
| Chlorantraniliprole | 0.2 ~ 200                                           | $y = 38141.83x - 21947.54$   | 0.9990 | 0.49                                        | 1.62                                        |
| Methoxyfenozide     | 0.2 ~ 200                                           | $y = 205378.50x + 182938.50$ | 0.9996 | 0.03                                        | 0.11                                        |
| Chromafenozide      | 0.2 ~ 200                                           | $y = 251364.24x + 465414.96$ | 0.9990 | 0.03                                        | 0.11                                        |
| Fenoxycarb          | 0.2 ~ 200                                           | $y = 155347.23x + 78372.29$  | 0.9997 | 0.05                                        | 0.17                                        |
| Tebufenozide        | 0.2 ~ 200                                           | $y = 200712.14x - 19897.48$  | 0.9996 | 0.04                                        | 0.12                                        |
| Flubendiamide       | 0.2 ~ 200                                           | $y = 20757.70x + 9172.73$    | 0.9997 | 0.04                                        | 0.12                                        |
| Buprofezin          | 0.2 ~ 200                                           | $y = 591392.16x + 560028.28$ | 0.9991 | 0.07                                        | 0.22                                        |
| Tolfenpyrad         | 0.5 ~ 200                                           | $y = 151573.37x + 56238.40$  | 0.9998 | 0.32                                        | 1.07                                        |
| Pyriproxyfen        | 0.5 ~ 200                                           | $y = 114534.19x - 14343.71$  | 0.9999 | 0.06                                        | 0.19                                        |

**Table S6** Analytical results of fruit samples ( $\mu\text{g}\cdot\text{kg}^{-1}$ )

| Fruit        | Flonicamid | Cyantraniliprole | RH-5849 | Chlorantraniliprole | Buprofezin | Tolfenpyrad |
|--------------|------------|------------------|---------|---------------------|------------|-------------|
| Pear         | -          | 3.28             | -       | -                   | 1.26       | -           |
| Peach 1      | -          | -                | -       | -                   | 0.32       | 1.63        |
| Peach 2      | -          | -                | -       | -                   | -          | -           |
| Grape 1      | -          | -                | -       | 0.14                | 0.32       | -           |
| Grape 2      | -          | -                | -       | -                   | -          | -           |
| Blueberry    | -          | -                | -       | -                   | 0.17       | -           |
| Strawberry 1 | -          | -                | -       | -                   | -          | -           |
| Strawberry 2 | 2.34       | -                | 0.20    | 0.19                | -          | -           |
| Apple        | -          | -                | -       | 0.18                | -          | -           |
| Grapefruit   | -          | -                | -       | -                   | -          | -           |
| Ugly orange  | -          | -                | -       | -                   | -          | -           |
| Kiwifruit    | -          | -                | -       | 0.15                | -          | -           |

-lower than the LOD

**Table S7** Analytical results of tea samples ( $\mu\text{g}\cdot\text{kg}^{-1}$ )

| Tea            | Chlorantranilprole | Buprofezin, | Tolfenpyrad |
|----------------|--------------------|-------------|-------------|
| White tea      | -                  | 6.35        | 1.09        |
| Green tea 1    | -                  | 0.47        | 0.83        |
| Green tea 2    | 0.76               | 38.60       | 391.843     |
| Lung Ching tea | -                  | 1.51        | 44.19       |
| Rose 1         | 1.04               | 0.34        | -           |
| Rose 2         | 1.52               | 0.18        | -           |
| Rose 3         | -                  | -           | -           |
| Chrysanthemum  | 0.74               | 0.24        | 1.07        |
| Jasmine Flower | 84.72              | 0.91        | 1.11        |
| Jasmine Tea    | -                  | 6.11        | 161.54      |
| Jasmine tip    | -                  | 0.63        | 8.17        |
| Dianhong       | -                  | 0.20        | 5.19        |
| Liubao tea     | -                  | 8.14        | 55.42       |
| Tieguanyin 1   | -                  | 15.57       | 16.38       |
| Tieguanyin 2   | -                  | 5.71        | 0.34        |
| Six fort tea   | -                  | -           | 0.63        |
| Peach iced tea | -                  | 0.31        | -           |
| Tieguanyin 1   | 1.09               | 16.81       | 934.86      |
| Tieguanyin 2   | -                  | 1.98        | 314.08      |
| Six fort tea   | -                  | 8.13        | 55.42       |
| Peach iced tea | -                  | 0.38        | -           |
| Tea bag 1      | 1.17               | 0.89        | 3.82        |
| Tea bag 2      | -                  | 0.21        | 1.30        |
| Tea bag 3      | 1.66               | 4.08        | 1125.15     |

-lower than the LOD
